# Supplementary material for: Gene Signature of Human Oral Mucosa Fibroblasts: Comparison with Dermal Fibroblasts and Induced Pluripotent Stem Cells
Source: Hindawi journal article supplement (doi:10.1155/2015/121575), 2015-01-01
Supplement: f1 [file 121575.f1.pdf]

# Supplementary Figure S1

**A**

| Array Name<br>(sample name) | hOF2 | hOF3 | hOF4 | hDF (TIG110) | hDF (TIG111) | hDF (TIG114) | hOF-iPSC3 | hOF-iPSC2 | hOF-iPSC4 |
|-----------------------------|------|------|------|--------------|--------------|--------------|-----------|-----------|-----------|
| hOF2                        | 1    | 0.99 | 0.96 | 0.97         | 0.97         | 0.94         | 0.77      | 0.78      | 0.77      |
| hOF3                        | 0.99 | 1    | 0.97 | 0.97         | 0.97         | 0.95         | 0.77      | 0.78      | 0.77      |
| hOF4                        | 0.96 | 0.97 | 1    | 0.95         | 0.92         | 0.96         | 0.78      | 0.79      | 0.78      |
| hDF (TIG110)                | 0.97 | 0.97 | 0.95 | 1            | 0.97         | 0.97         | 0.78      | 0.79      | 0.78      |
| hDF (TIG111)                | 0.97 | 0.97 | 0.92 | 0.97         | 1            | 0.94         | 0.77      | 0.78      | 0.76      |
| hDF (TIG114)                | 0.94 | 0.95 | 0.96 | 0.97         | 0.94         | 1            | 0.78      | 0.78      | 0.79      |
| hOF-iPSC3                   | 0.77 | 0.77 | 0.78 | 0.78         | 0.77         | 0.78         | 1         | 0.99      | 0.99      |
| hOF-iPSC2                   | 0.78 | 0.78 | 0.79 | 0.79         | 0.78         | 0.78         | 0.99      | 1         | 0.99      |
| hOF-iPSC4                   | 0.77 | 0.77 | 0.78 | 0.78         | 0.76         | 0.79         | 0.99      | 0.99      | 1         |
|                             | 0.8  | 0.83 | 0.85 | 0.88         | 0.9          | 0.93         | 0.95      | 0.98      | 1         |
|                             | 0.8  |      |      |              | 0.9          |              |           |           |           |

**B**

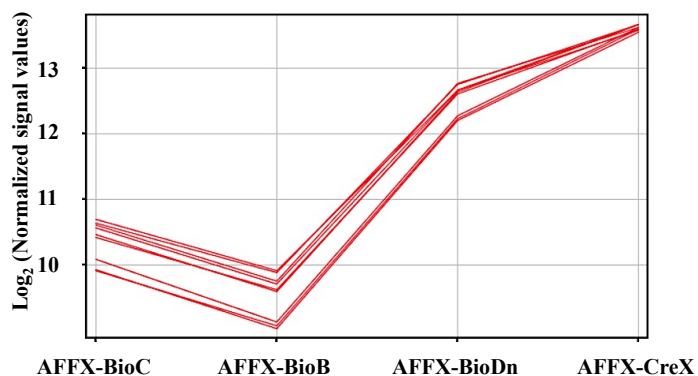

**C**

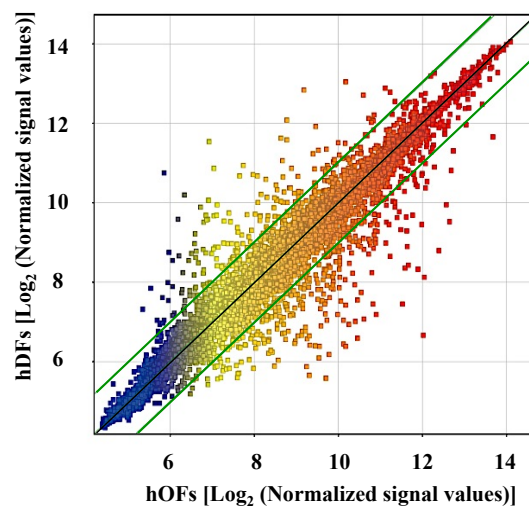

# Supplementary Figure S2

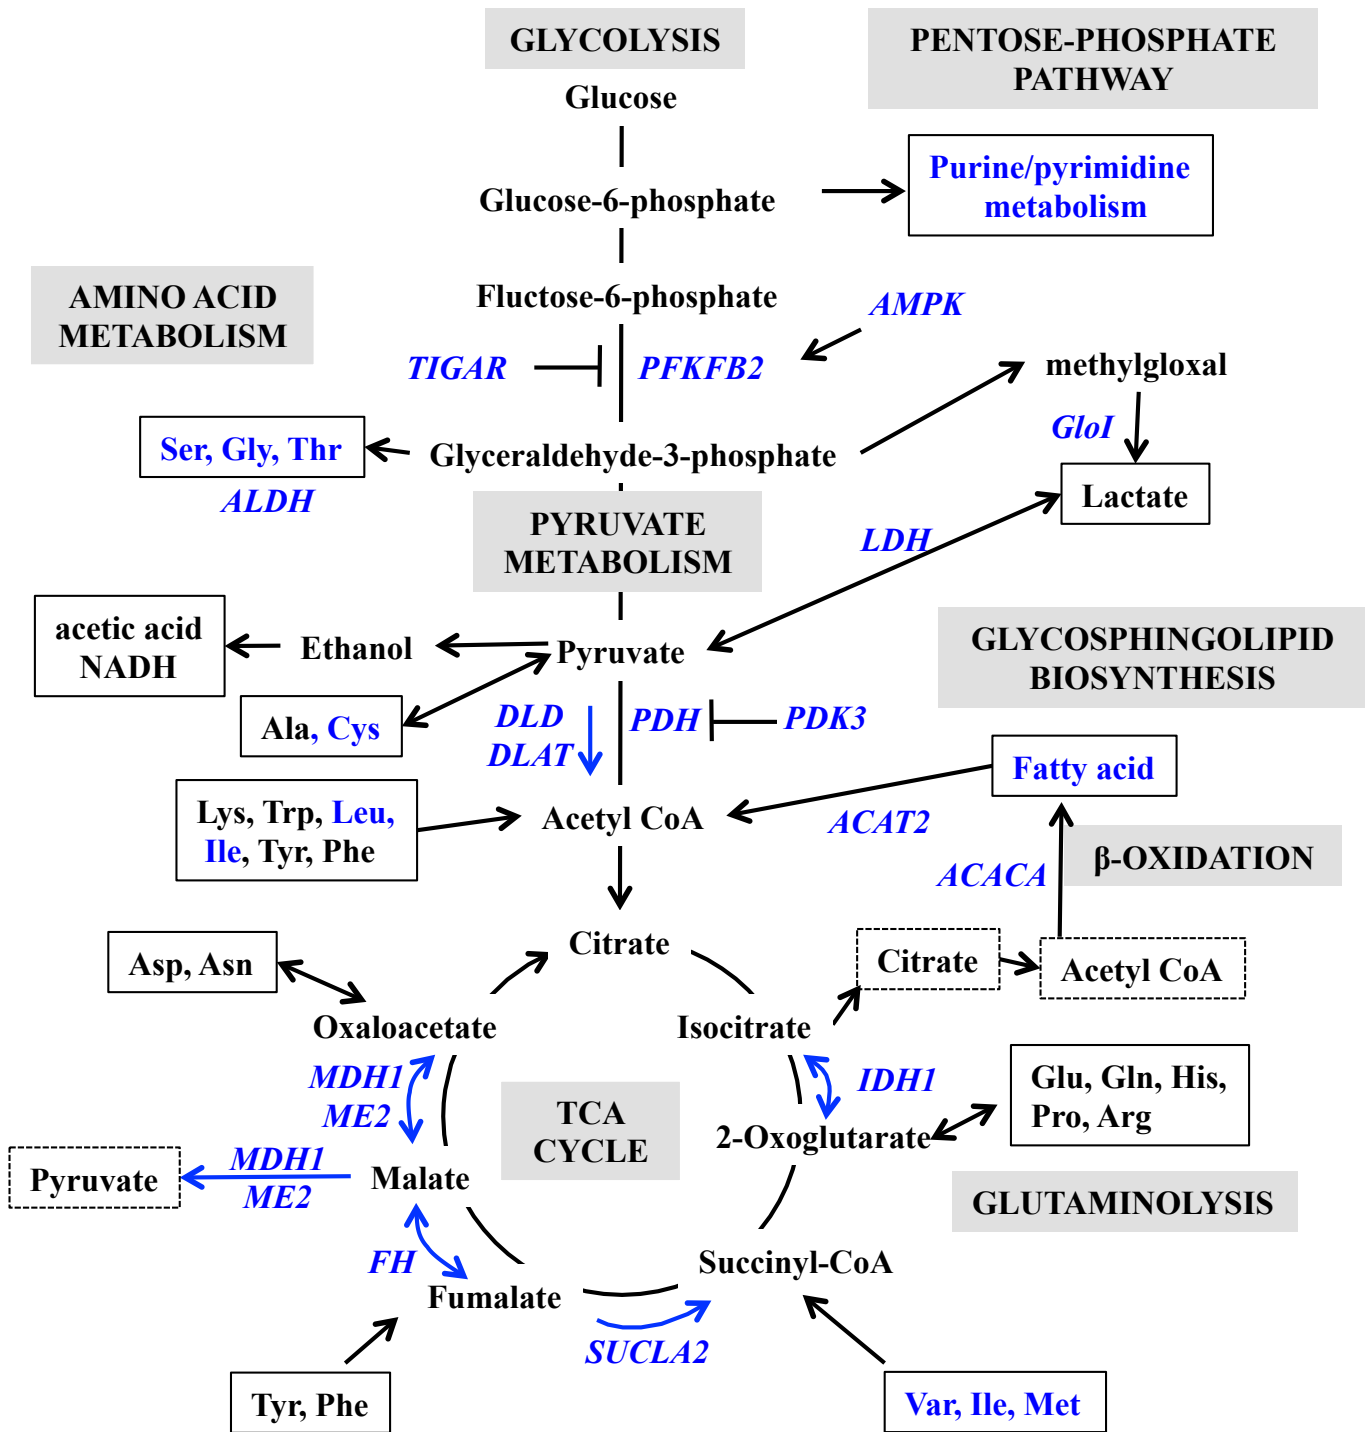

## Supplementary Figure S3

| Entrez GeneID | Gene Symbol   | Gene Name                                                    | hODs   | hDFs   | hOF-iPSCs |
|---------------|---------------|--------------------------------------------------------------|--------|--------|-----------|
| 644           | <i>BLVRA</i>  | <i>biliverdin reductase A</i>                                | 223.9  | 259.3  | 253.0     |
| 3162          | <i>HMOX1</i>  | <i>heme oxygenase 1</i>                                      | 1474.2 | 2698.0 | 452.3     |
| 9365          | <i>KL</i>     | <i>klotho</i>                                                | 54.1   | 44.8   | 36.5      |
| 10135         | <i>NAMPT</i>  | <i>nicotinamide phosphoribosyltransferase</i>                | 827.7  | 626.2  | 2999.8    |
| 4780          | <i>NFE2L2</i> | <i>nuclear factor (erythroid-derived 2) related factor 2</i> | 2134.5 | 1331.7 | 1006.2    |
| 5467          | <i>PPARD</i>  | <i>peroxisome proliferator-activated receptor delta</i>      | 1534.6 | 1352.9 | 330.8     |
| 5468          | <i>PPARG</i>  | <i>peroxisome proliferator-activated receptor gamma</i>      | 524.4  | 100.8  | 63.0      |
| 5621          | <i>PRNP</i>   | <i>prion protein</i>                                         | 4059.0 | 3134.1 | 1065.5    |
| 5925          | <i>RB1</i>    | <i>retinoblastoma 1</i>                                      | 882.9  | 805.8  | 739.3     |
| 23411         | <i>SIRT1</i>  | <i>sirtuin 1</i>                                             | 231.5  | 216.8  | 1676.0    |
| 7157          | <i>TP53</i>   | <i>tumor protein p53</i>                                     | 2107.7 | 2197.0 | 2149.1    |

## Supplementary Figure S4

| Entrez Gene ID | Expressed Allele | Location       | Gene Symbol   | Gene Name                                                                  | hOFs   | hDFs  | hOF-iPSCs |
|----------------|------------------|----------------|---------------|----------------------------------------------------------------------------|--------|-------|-----------|
| 9077           | Paternal         | 1p31 AS        | <i>DIRAS3</i> | <i>DIRAS family, GTP-binding RAS-like 3</i>                                | 254.9  | 140.7 | 72.4      |
| 23089          | Paternal         | 7q21           | <i>PEG10</i>  | <i>paternally expressed 10</i>                                             | 257.1  | 374.8 | 1841.9    |
| 283120         | Maternal         | 11p15.5 AS     | <i>H19</i>    | <i>H19, imprinted maternally expressed transcript (non-protein coding)</i> | 1304.4 | 801.3 | 559.8     |
| 3481           | Paternal         | 11p15.5 AS     | <i>IGF2</i>   | <i>insulin-like growth factor 2 (somatomedin A)</i>                        | 1060.0 | 184.8 | 82.6      |
| 3784           | Maternal         | 11p15.5        | <i>KCNQ1</i>  | <i>potassium voltage-gated channel, KQT-like subfamily, member 1</i>       | 150.2  | 147.2 | 107.9     |
| 55384          | Maternal         | 14q32          | <i>MEG3</i>   | <i>maternally expressed 3 (non-protein coding)</i>                         | 738.9  | 418.8 | 476.7     |
| 8788           | Paternal         | 14q32          | <i>DLK1</i>   | <i>delta-like 1 homolog</i>                                                | 161.4  | 182.5 | 173.5     |
| 388015         | Paternal         | 14q32.31 AS    | <i>RTL1</i>   | <i>retrotransposon-like 1</i>                                              | 78.9   | 79.0  | 68.7      |
| 1735           | Paternal         | 14q32          | <i>Dio3</i>   | <i>deiodinase, iodothyronine, type III</i>                                 | 76.5   | 84.5  | 68.6      |
| 79104          | Maternal         | 14q32.31       | <i>MEG8</i>   | <i>maternally expressed 8 (non-protein coding)</i>                         | n.d.   | n.d.  | n.d.      |
| 4692           | Paternal         | 15q11.2-q12 AS | <i>NDN</i>    | <i>necdin homolog (mouse)</i>                                              | 147.2  | 122.5 | 98.9      |
| 5178           | Paternal         | 19q13.4 AS     | <i>PEG3</i>   | <i>paternally expressed 3</i>                                              | 104.5  | 107.8 | 86.7      |

**Supplementary Table S2. Gene list in Figure 3D.**

| <b>Entrez GeneID</b> | <b>Symbol</b> | <b>Gene name</b>                                                                                                        |
|----------------------|---------------|-------------------------------------------------------------------------------------------------------------------------|
| 196883               | <i>ADCY4</i>  | <i>adenylate cyclase 4</i>                                                                                              |
| 115                  | <i>ADCY9</i>  | <i>adenylate cyclase 9</i>                                                                                              |
| 147                  | <i>ADRA1B</i> | <i>adrenoceptor alpha 1B</i>                                                                                            |
| 408                  | <i>ARRB1</i>  | <i>arrestin, beta 1</i>                                                                                                 |
| 624                  | <i>BDKRB2</i> | <i>bradykinin receptor B2</i>                                                                                           |
| 652                  | <i>BMP4</i>   | <i>bone morphogenetic protein 4</i>                                                                                     |
| 718                  | <i>C3</i>     | <i>complement component 3</i>                                                                                           |
| 720                  | <i>C4A</i>    | <i>complement component 4A (Rodgers blood group)</i>                                                                    |
| 1675                 | <i>CFD</i>    | <i>complement factor D (adipsin)</i>                                                                                    |
| 1129                 | <i>CHRM2</i>  | <i>cholinergic receptor, muscarinic 2</i>                                                                               |
| 9547                 | <i>CXCL14</i> | <i>chemokine (C-X-C motif) ligand 14</i>                                                                                |
| 58191                | <i>CXCL16</i> | <i>chemokine (C-X-C motif) ligand 16</i>                                                                                |
| 81624                | <i>DIAPH3</i> | <i>diaphanous-related formin 3</i>                                                                                      |
| 9829                 | <i>DNAJC6</i> | <i>DnaJ (Hsp40) homolog, subfamily C, member 6</i>                                                                      |
| 1909                 | <i>EDNRA</i>  | <i>endothelin receptor type A</i>                                                                                       |
| 1910                 | <i>EDNRB</i>  | <i>endothelin receptor type B</i>                                                                                       |
| 1956                 | <i>EGFR</i>   | <i>epidermal growth factor receptor</i>                                                                                 |
| 30845                | <i>EHD3</i>   | <i>EH-domain containing 3</i>                                                                                           |
| 2044                 | <i>EPHA5</i>  | <i>EPH receptor A5</i>                                                                                                  |
| 2051                 | <i>EPHB6</i>  | <i>EPH receptor B6</i>                                                                                                  |
| 2159                 | <i>F10</i>    | <i>coagulation factor X</i>                                                                                             |
| 2149                 | <i>F2R</i>    | <i>coagulation factor II (thrombin) receptor</i>                                                                        |
| 8817                 | <i>FGF18</i>  | <i>fibroblast growth factor 18</i>                                                                                      |
| 2277                 | <i>FIGF</i>   | <i>c-fos induced growth factor (vascular endothelial growth factor D)</i>                                               |
| 2321                 | <i>FLT1</i>   | <i>fms-related tyrosine kinase 1</i>                                                                                    |
| 2869                 | <i>GRK5</i>   | <i>G protein-coupled receptor kinase 5</i>                                                                              |
| 3082                 | <i>HGF</i>    | <i>hepatocyte growth factor (hepapoietin A; scatter factor)</i>                                                         |
| 3481                 | <i>IGF2</i>   | <i>insulin-like growth factor 2</i>                                                                                     |
| 8516                 | <i>ITGA8</i>  | <i>integrin, alpha 8</i>                                                                                                |
| 3949                 | <i>LDLR</i>   | <i>low density lipoprotein receptor</i>                                                                                 |
| 4286                 | <i>MITF</i>   | <i>microphthalmia-associated transcription factor</i>                                                                   |
| 5228                 | <i>PGF</i>    | <i>placental growth factor</i>                                                                                          |
| 5468                 | <i>PPARG</i>  | <i>peroxisome proliferator-activated receptor gamma</i>                                                                 |
| 5727                 | <i>PTCH1</i>  | <i>patched 1</i>                                                                                                        |
| 2185                 | <i>PTK2B</i>  | <i>protein tyrosine kinase 2 beta</i>                                                                                   |
| 6092                 | <i>ROBO2</i>  | <i>roundabout, axon guidance receptor, homolog 2 (Drosophila)</i>                                                       |
| 223117               | <i>SEMA3D</i> | <i>sema domain, immunoglobulin domain (Ig), short basic domain, secreted, (semaphorin) 3D</i>                           |
| 6405                 | <i>SEMA3F</i> | <i>sema domain, immunoglobulin domain (Ig), short basic domain, secreted, (semaphorin) 3F</i>                           |
| 10507                | <i>SEMA4D</i> | <i>sema domain, immunoglobulin domain (Ig), transmembrane domain (TM) and short cytoplasmic domain, (semaphorin) 4D</i> |
| 53358                | <i>SHC3</i>   | <i>SHC (Src homology 2 domain containing) transforming protein 3</i>                                                    |
| 4088                 | <i>SMAD3</i>  | <i>SMAD family member 3</i>                                                                                             |
| 83439                | <i>TCF7L1</i> | <i>transcription factor 7-like 1 (T-cell specific, HMG-box)</i>                                                         |
| 7035                 | <i>TFPI</i>   | <i>tissue factor pathway inhibitor (lipoprotein-associated coagulation inhibitor)</i>                                   |
| 7042                 | <i>TGFB2</i>  | <i>transforming growth factor, beta 2</i>                                                                               |
| 7448                 | <i>VTN</i>    | <i>vitronectin</i>                                                                                                      |
| 51384                | <i>WNT16</i>  | <i>wingless-type MMTV integration site family, member 16</i>                                                            |

**Supplementary Table S3. Gene list in Figure 3E.**

| <b>Entrez<br/>GeneID</b> | <b><i>Symbol</i></b> | <b><i>Gene name</i></b>                                                                       |
|--------------------------|----------------------|-----------------------------------------------------------------------------------------------|
| 595                      | <i>CCND1</i>         | <i>cyclin D1</i>                                                                              |
| 1311                     | <i>COMP</i>          | <i>cartilage oligomeric matrix protein</i>                                                    |
| 4616                     | <i>GADD45B</i>       | <i>growth arrest and DNA-damage-inducible, beta</i>                                           |
| 3486                     | <i>IGFBP3</i>        | <i>insulin-like growth factor binding protein 3</i>                                           |
| 22801                    | <i>ITGA11</i>        | <i>integrin, alpha 11</i>                                                                     |
| 3655                     | <i>ITGA6</i>         | <i>integrin, alpha 6</i>                                                                      |
| 56034                    | <i>PDGFC</i>         | <i>platelet derived growth factor C</i>                                                       |
| 5054                     | <i>SERPINE1</i>      | <i>serpin peptidase inhibitor, clade E (plasminogen activator inhibitor type 1), member 1</i> |
| 3371                     | <i>TNC</i>           | <i>tenascin C</i>                                                                             |

**Supplementary Table S4. Gene list in G1 categorized in Figure 4A.**

[hOFs = hOF-iPSCs > hDFs (58 genes)]

| Entrez GeneID           | Symbol          | Gene name                                                                                                               | hOFs*    | hDFs*    | hOF-iPSCs* |
|-------------------------|-----------------|-------------------------------------------------------------------------------------------------------------------------|----------|----------|------------|
| <b>ECM/Secreted</b>     |                 |                                                                                                                         |          |          |            |
| 652                     | <i>BMP4</i>     | <i>bone morphogenetic protein 4</i>                                                                                     | 1,145.64 | 171.93   | 723.07     |
| 5764                    | <i>PTN</i>      | <i>pleiotrophin</i>                                                                                                     | 445.93   | 108.86   | 236.02     |
| 6414                    | <i>SEPP1</i>    | <i>selenoprotein P, plasma, 1</i>                                                                                       | 566.50   | 162.79   | 581.10     |
| <b>Membrane protein</b> |                 |                                                                                                                         |          |          |            |
| 928                     | <i>CD9</i>      | <i>CD9 molecule</i>                                                                                                     | 1,765.96 | 302.50   | 2,569.37   |
| 54805                   | <i>CNNM2</i>    | <i>cyclin M2</i>                                                                                                        | 621.14   | 260.96   | 473.88     |
| 286097                  | <i>EFHA2</i>    | <i>EF-hand domain family, member A2</i>                                                                                 | 233.76   | 110.00   | 161.69     |
| 2719                    | <i>GPC3</i>     | <i>glypican 3</i>                                                                                                       | 1,148.59 | 83.85    | 2,052.12   |
| 182                     | <i>JAG1</i>     | <i>jagged 1</i>                                                                                                         | 572.88   | 201.35   | 506.70     |
| 154141                  | <i>MBOAT1</i>   | <i>membrane bound O-acyltransferase domain containing 1</i>                                                             | 723.38   | 191.11   | 1,087.47   |
| 81832                   | <i>NETO1</i>    | <i>neuropilin (NRP) and tolloid (TLL)-like 1</i>                                                                        | 197.37   | 52.57    | 261.25     |
| 22871                   | <i>NLGN1</i>    | <i>neuroligin 1</i>                                                                                                     | 428.97   | 95.37    | 256.63     |
| 10507                   | <i>SEMA4D</i>   | <i>sema domain, immunoglobulin domain (Ig), transmembrane domain (TM) and short cytoplasmic domain, (semaphorin) 4D</i> | 322.63   | 92.17    | 609.81     |
| <b>Receptor</b>         |                 |                                                                                                                         |          |          |            |
| 1909                    | <i>EDNRA</i>    | <i>endothelin receptor type A</i>                                                                                       | 627.40   | 101.39   | 318.24     |
| 1910                    | <i>EDNRB</i>    | <i>endothelin receptor type B</i>                                                                                       | 830.53   | 48.39    | 777.82     |
| 2149                    | <i>F2R</i>      | <i>coagulation factor II (thrombin) receptor</i>                                                                        | 840.23   | 243.10   | 422.44     |
| 51704                   | <i>GPRC5B</i>   | <i>G protein-coupled receptor, family C, group 5, member B</i>                                                          | 3,062.22 | 331.04   | 4,258.31   |
| 3949                    | <i>LDLR</i>     | <i>low density lipoprotein receptor</i>                                                                                 | 2,242.41 | 1,100.47 | 1,697.41   |
| 10200                   | <i>MPHOSPH6</i> | <i>M-phase phosphoprotein 6</i>                                                                                         | 199.15   | 96.47    | 380.36     |
| 23596                   | <i>OPN3</i>     | <i>opsin 3</i>                                                                                                          | 522.00   | 254.57   | 295.57     |
| 5638                    | <i>PRRG1</i>    | <i>proline rich Gla (G-carboxyglutamic acid) 1</i>                                                                      | 382.29   | 167.54   | 348.33     |
| 5727                    | <i>PTCH1</i>    | <i>patched 1</i>                                                                                                        | 1,042.34 | 373.70   | 1,736.94   |
| 154091                  | <i>SLC2A12</i>  | <i>solute carrier family 2 (facilitated glucose transporter), member 12</i>                                             | 603.62   | 58.76    | 318.58     |
| <b>Enzyme</b>           |                 |                                                                                                                         |          |          |            |
| 51363                   | <i>CHST15</i>   | <i>carbohydrate (N-acetylgalactosamine 4-sulfate 6-O) sulfotransferase 15</i>                                           | 530.65   | 190.96   | 309.00     |
| 1717                    | <i>DHCR7</i>    | <i>7-dehydrocholesterol reductase</i>                                                                                   | 1,567.48 | 737.66   | 1,807.00   |
| 2053                    | <i>EPHX2</i>    | <i>epoxide hydrolase 2, cytoplasmic</i>                                                                                 | 133.74   | 58.30    | 90.70      |
| 55224                   | <i>ETNK2</i>    | <i>ethanolamine kinase 2</i>                                                                                            | 793.70   | 268.64   | 718.60     |
| 8630                    | <i>HSD17B6</i>  | <i>hydroxysteroid (17-beta) dehydrogenase 6 homolog (mouse)</i>                                                         | 146.90   | 48.68    | 115.49     |
| 25840                   | <i>METTL7A</i>  | <i>methyltransferase like 7A</i>                                                                                        | 279.46   | 103.78   | 188.35     |
| 221692                  | <i>PHACTR1</i>  | <i>phosphatase and actin regulator 1</i>                                                                                | 293.74   | 133.44   | 179.63     |

|                                   |                |                                                                         |          |        |          |
|-----------------------------------|----------------|-------------------------------------------------------------------------|----------|--------|----------|
| 9262                              | <i>STK17B</i>  | <i>serine/threonine kinase 17b</i>                                      | 1,707.03 | 525.32 | 908.08   |
| <b>Signaling</b>                  |                |                                                                         |          |        |          |
| 9590                              | <i>AKAP12</i>  | <i>A kinase (PRKA) anchor protein 12</i>                                | 558.88   | 101.52 | 675.64   |
| 408                               | <i>ARRB1</i>   | <i>arrestin, beta 1</i>                                                 | 1,816.62 | 464.48 | 1,062.94 |
| 9829                              | <i>DNAJC6</i>  | <i>DnaJ (Hsp40) homolog, subfamily C, member 6</i>                      | 244.47   | 100.57 | 131.13   |
| 9732                              | <i>DOCK4</i>   | <i>dedicator of cytokinesis 4</i>                                       | 299.23   | 89.40  | 394.20   |
| 25827                             | <i>FBXL2</i>   | <i>F-box and leucine-rich repeat protein 2</i>                          | 387.80   | 142.04 | 196.52   |
| 3485                              | <i>IGFBP2</i>  | <i>insulin-like growth factor binding protein 2, 36kDa</i>              | 3,214.92 | 345.69 | 1,837.77 |
| 90293                             | <i>KLHL13</i>  | <i>kelch-like 13 (Drosophila)</i>                                       | 118.70   | 43.03  | 159.32   |
| 9079                              | <i>LDB2</i>    | <i>LIM domain binding 2</i>                                             | 1,260.05 | 428.25 | 800.85   |
| 114876                            | <i>OSBPL1A</i> | <i>oxysterol binding protein-like 1A</i>                                | 385.91   | 187.71 | 530.29   |
| 5287                              | <i>PIK3C2B</i> | <i>phosphoinositide-3-kinase, class 2, beta polypeptide</i>             | 248.11   | 114.91 | 243.96   |
| 54477                             | <i>PLEKHA5</i> | <i>pleckstrin homology domain containing, family A member 5</i>         | 544.34   | 173.03 | 1,062.80 |
| 5997                              | <i>RGS2</i>    | <i>regulator of G-protein signaling 2, 24kDa</i>                        | 606.02   | 96.03  | 456.93   |
| <b>Transcriptional regulation</b> |                |                                                                         |          |        |          |
| 2114                              | <i>ETS2</i>    | <i>v-ets erythroblastosis virus E26 oncogene homolog 2 (avian)</i>      | 740.82   | 348.60 | 621.02   |
| 51804                             | <i>SIX4</i>    | <i>SIX homeobox 4</i>                                                   | 825.37   | 399.69 | 1,327.50 |
| 56849                             | <i>TCEAL7</i>  | <i>transcription elongation factor A (SII)-like 7</i>                   | 353.00   | 175.74 | 221.59   |
| 83439                             | <i>TCF7L1</i>  | <i>transcription factor 7-like 1 (T-cell specific, HMG-box)</i>         | 1,981.90 | 829.81 | 1,863.20 |
| 7088                              | <i>TLE1</i>    | <i>transducin-like enhancer of split 1 (E(sp1) homolog, Drosophila)</i> | 830.79   | 319.75 | 1,129.28 |
| 9760                              | <i>TOX</i>     | <i>thymocyte selection-associated high mobility group box</i>           | 1,289.94 | 301.64 | 782.68   |
| <b>Others</b>                     |                |                                                                         |          |        |          |
| 81563                             | <i>Clorf21</i> | <i>chromosome 1 open reading frame 21</i>                               | 1,799.54 | 718.36 | 1,488.53 |
| 81624                             | <i>DIAPH3</i>  | <i>diaphanous homolog 3 (Drosophila)</i>                                | 361.94   | 156.90 | 617.43   |
| 7802                              | <i>DNAL1I</i>  | <i>dynein, axonemal, light intermediate chain 1</i>                     | 617.56   | 265.48 | 597.25   |
| 54536                             | <i>EXOC6</i>   | <i>exocyst complex component 6</i>                                      | 143.21   | 70.12  | 166.65   |
| 83641                             | <i>FAM107B</i> | <i>family with sequence similarity 107, member B</i>                    | 437.79   | 211.14 | 347.81   |
| 221303                            | <i>FAM162B</i> | <i>family with sequence similarity 162, member B</i>                    | 1,349.86 | 576.11 | 818.38   |
| 256227                            | <i>STEAP1B</i> | <i>STEAP family member 1B</i>                                           | 359.74   | 144.26 | 402.06   |
| 54970                             | <i>TTC12</i>   | <i>tetratricopeptide repeat domain 12</i>                               | 241.10   | 95.59  | 175.52   |
| 125488                            | <i>TTC39C</i>  | <i>tetratricopeptide repeat domain 39C</i>                              | 1,445.40 | 530.95 | 908.84   |
| 57507                             | <i>ZNF608</i>  | <i>zinc finger protein 608</i>                                          | 473.56   | 147.91 | 815.54   |

\*The numbers indicate average signal values in each cell type.



**Supplementary Table S5. Gene list in G2 categorized in Figure 4A.**

**[hOFs > hOF-iPSCs = hDFs (103 genes)]**

| <b>Entrez GeneID</b>    | <b>Symbol</b>   | <b>Gene name</b>                                                                              | <b>hOFs*</b> | <b>hDFs*</b> | <b>hOF-iPSCs*</b> |
|-------------------------|-----------------|-----------------------------------------------------------------------------------------------|--------------|--------------|-------------------|
| <b>ECM/Secreted</b>     |                 |                                                                                               |              |              |                   |
| 170689                  | <i>ADAMTS15</i> | <i>ADAM metalloproteinase with thrombospondin type 1 motif, 15</i>                            | 1,002.73     | 147.39       | 119.07            |
| 9547                    | <i>CXCL14</i>   | <i>chemokine (C-X-C motif) ligand 14</i>                                                      | 935.32       | 229.85       | 231.33            |
| 58191                   | <i>CXCL16</i>   | <i>chemokine (C-X-C motif) ligand 16</i>                                                      | 371.76       | 125.23       | 126.61            |
| 25975                   | <i>EGFL6</i>    | <i>EGF-like-domain, multiple 6</i>                                                            | 497.45       | 88.14        | 101.46            |
| 2201                    | <i>FBN2</i>     | <i>fibrillin 2</i>                                                                            | 5,342.37     | 446.65       | 225.84            |
| 8817                    | <i>FGF18</i>    | <i>fibroblast growth factor 18</i>                                                            | 1,140.65     | 270.03       | 164.82            |
| 2277                    | <i>FIGF</i>     | <i>c-fos induced growth factor (vascular endothelial growth factor D)</i>                     | 92.12        | 40.63        | 36.24             |
| 342035                  | <i>GLDN</i>     | <i>gliomedin</i>                                                                              | 164.76       | 65.80        | 54.88             |
| 3082                    | <i>HGF</i>      | <i>hepatocyte growth factor (hepapoietin A; scatter factor)</i>                               | 252.34       | 57.54        | 44.97             |
| 4685                    | <i>NCAM2</i>    | <i>neural cell adhesion molecule 2</i>                                                        | 143.67       | 67.59        | 52.89             |
| 5179                    | <i>PENK</i>     | <i>proenkephalin</i>                                                                          | 2,914.14     | 175.21       | 103.79            |
| 5228                    | <i>PGF</i>      | <i>placental growth factor</i>                                                                | 1,484.07     | 214.93       | 119.91            |
| 284654                  | <i>RSPO1</i>    | <i>R-spondin 1</i>                                                                            | 698.57       | 291.67       | 148.91            |
| 340419                  | <i>RSPO2</i>    | <i>R-spondin 2</i>                                                                            | 260.65       | 81.29        | 66.31             |
| 6405                    | <i>SEMA3F</i>   | <i>sema domain, immunoglobulin domain (Ig), short basic domain, secreted, (semaphorin) 3F</i> | 575.91       | 228.16       | 245.48            |
| 51384                   | <i>WNT16</i>    | <i>wingless-type MMTV integration site family, member 16</i>                                  | 211.59       | 99.22        | 69.88             |
| <b>Membrane protein</b> |                 |                                                                                               |              |              |                   |
| 54805                   | <i>CNNM2</i>    | <i>cyclin M2</i>                                                                              | 621.14       | 260.96       | 473.88            |
| 10584                   | <i>COLEC10</i>  | <i>collectin sub-family member 10 (C-type lectin)</i>                                         | 137.68       | 59.88        | 48.13             |
| 2039                    | <i>EPB49</i>    | <i>erythrocyte membrane protein band 4.9 (dematin)</i>                                        | 310.87       | 133.16       | 77.72             |
| 3383                    | <i>ICAM1</i>    | <i>intercellular adhesion molecule 1</i>                                                      | 579.56       | 246.95       | 160.73            |
| 223117                  | <i>SEMA3D</i>   | <i>sema domain, immunoglobulin domain (Ig), short basic domain, secreted, (semaphorin) 3D</i> | 932.65       | 244.67       | 221.81            |
| 56241                   | <i>SUSD2</i>    | <i>sushi domain containing 2</i>                                                              | 424.90       | 177.73       | 138.88            |
| 222865                  | <i>TMEM130</i>  | <i>transmembrane protein 130</i>                                                              | 1,224.19     | 358.83       | 218.42            |
| 219623                  | <i>TMEM26</i>   | <i>transmembrane protein 26</i>                                                               | 153.13       | 58.15        | 51.67             |
| 11045                   | <i>UPK1A</i>    | <i>uroplakin 1A</i>                                                                           | 270.13       | 108.42       | 107.83            |
| <b>Receptor</b>         |                 |                                                                                               |              |              |                   |
| 2044                    | <i>EPHA5</i>    | <i>EPH receptor A5</i>                                                                        | 195.17       | 52.39        | 46.50             |
| 2051                    | <i>EPHB6</i>    | <i>EPH receptor B6</i>                                                                        | 901.41       | 234.08       | 196.97            |
| 2149                    | <i>F2R</i>      | <i>coagulation factor II (thrombin) receptor</i>                                              | 840.23       | 243.10       | 422.44            |
| 2151                    | <i>F2RL2</i>    | <i>coagulation factor II (thrombin) receptor-like 2</i>                                       | 1,388.20     | 97.04        | 106.69            |
| 2828                    | <i>GPR4</i>     | <i>G protein-coupled receptor 4</i>                                                           | 339.03       | 168.19       | 109.05            |

|                  |                                      |                                                                                  |          |          |          |
|------------------|--------------------------------------|----------------------------------------------------------------------------------|----------|----------|----------|
| 3949             | <i>LDLR</i>                          | <i>low density lipoprotein receptor</i>                                          | 2,242.41 | 1,100.47 | 1,697.41 |
| 8013             | <i>NR4A3</i>                         | <i>nuclear receptor subfamily 4, group A, member 3</i>                           | 812.63   | 175.44   | 93.30    |
| 23596            | <i>OPN3</i>                          | <i>opsin 3</i>                                                                   | 522.00   | 254.57   | 295.57   |
| 6092             | <i>ROBO2</i>                         | <i>roundabout, axon guidance receptor, homolog 2 (Drosophila)</i>                | 871.92   | 72.79    | 81.39    |
| 1903             | <i>SIPR3</i>                         | <i>sphingosine-1-phosphate receptor 3</i>                                        | 486.04   | 222.20   | 177.63   |
| 57559            | <i>STAMBPL1</i>                      | <i>STAM binding protein-like 1</i>                                               | 1,331.74 | 246.44   | 151.22   |
| 7098             | <i>TLR3</i>                          | <i>toll-like receptor 3</i>                                                      | 264.38   | 102.71   | 81.30    |
| <b>Channel</b>   |                                      |                                                                                  |          |          |          |
| 54102            | <i>CLIC6</i>                         | <i>chloride intracellular channel 6</i>                                          | 333.86   | 140.65   | 149.92   |
| 286097           | <i>EFHA2</i><br>(= <i>MICU3</i> )    | <i>EF-hand domain family, member A2</i>                                          | 233.76   | 110.00   | 161.69   |
| 3788             | <i>KCNS2</i>                         | <i>potassium voltage-gated channel, delayed-rectifier, subfamily S, member 2</i> | 384.36   | 157.62   | 107.72   |
| 6335             | <i>SCN9A</i>                         | <i>sodium channel, voltage-gated, type IX, alpha subunit</i>                     | 594.07   | 109.09   | 109.71   |
| <b>Transport</b> |                                      |                                                                                  |          |          |          |
| 9829             | <i>DNAJC6</i><br>(= <i>auxilin</i> ) | <i>DnaJ (Hsp40) homolog, subfamily C, member 6</i>                               | 244.47   | 100.57   | 131.13   |
| 30845            | <i>EHD3</i>                          | <i>EH-domain containing 3</i>                                                    | 1,716.78 | 695.62   | 358.06   |
| 30061            | <i>SLC40A1</i>                       | <i>solute carrier family 40 (iron-regulated transporter), member 1</i>           | 220.16   | 86.22    | 60.44    |
| 28232            | <i>SLCO3A1</i>                       | <i>solute carrier organic anion transporter family, member 3A1</i>               | 1,871.92 | 630.79   | 683.84   |
| 64220            | <i>STRA6</i>                         | <i>stimulated by retinoic acid gene 6 homolog (mouse)</i>                        | 426.14   | 170.43   | 142.68   |
| <b>Enzyme</b>    |                                      |                                                                                  |          |          |          |
| 81792            | <i>ADAMTS12</i>                      | <i>ADAM metallopeptidase with thrombospondin type 1 motif, 12</i>                | 1,039.43 | 355.23   | 310.06   |
| 126              | <i>ADH1C</i>                         | <i>alcohol dehydrogenase 1C (class I), gamma polypeptide</i>                     | 196.14   | 82.88    | 43.81    |
| 217              | <i>ALDH2</i>                         | <i>aldehyde dehydrogenase 2 family (mitochondrial)</i>                           | 2,581.97 | 1,040.36 | 1,137.16 |
| 415              | <i>ARSE</i>                          | <i>arylsulfatase E (chondrodysplasia punctata 1)</i>                             | 567.49   | 176.13   | 273.43   |
| 834              | <i>CASP1</i>                         | <i>caspase 1, apoptosis-related cysteine peptidase</i>                           | 139.16   | 47.90    | 26.82    |
| 51363            | <i>CHST15</i>                        | <i>carbohydrate (N-acetylgalactosamine 4-sulfate 6-O) sulfotransferase 15</i>    | 530.65   | 190.96   | 309.00   |
| 2053             | <i>EPHX2</i>                         | <i>epoxide hydrolase 2, cytoplasmic</i>                                          | 133.74   | 58.30    | 90.70    |
| 2138             | <i>EYA1</i>                          | <i>eyes absent homolog 1 (Drosophila)</i>                                        | 693.37   | 84.87    | 117.43   |
| 2326             | <i>FMO1</i>                          | <i>flavin containing monooxygenase 1</i>                                         | 88.92    | 36.71    | 31.44    |
| 3294             | <i>HSD17B2</i>                       | <i>hydroxysteroid (17-beta) dehydrogenase 2</i>                                  | 309.54   | 94.48    | 72.46    |
| 11185            | <i>INMT</i>                          | <i>indolethylamine N-methyltransferase</i>                                       | 499.36   | 206.20   | 109.09   |
| 57134            | <i>MAN1C1</i>                        | <i>mannosidase, alpha, class 1C, member 1</i>                                    | 813.28   | 304.28   | 206.89   |
| 25840            | <i>METTL7A</i>                       | <i>methyltransferase like 7A</i>                                                 | 279.46   | 103.78   | 188.35   |
| 2185             | <i>PTK2B</i>                         | <i>PTK2B protein tyrosine kinase 2 beta</i>                                      | 1,029.69 | 234.43   | 124.39   |
| 401494           | <i>PTPLAD2</i>                       | <i>protein tyrosine phosphatase-like A domain containing 2</i>                   | 625.76   | 236.72   | 143.25   |

|                                   |                  |                                                                                       |          |        |        |
|-----------------------------------|------------------|---------------------------------------------------------------------------------------|----------|--------|--------|
| 9262                              | <i>STK17B</i>    | <i>serine/threonine kinase 17b</i>                                                    | 1,707.03 | 525.32 | 908.08 |
| 11274                             | <i>USP18</i>     | <i>ubiquitin specific peptidase 18</i>                                                | 800.73   | 298.52 | 284.62 |
| <b>Signaling</b>                  |                  |                                                                                       |          |        |        |
| 57569                             | <i>ARHGAP20</i>  | <i>Rho GTPase activating protein 20</i>                                               | 178.88   | 86.49  | 47.74  |
| 9411                              | <i>ARHGAP29</i>  | <i>Rho GTPase activating protein 29</i>                                               | 627.56   | 260.05 | 150.02 |
| 56892                             | <i>C8orf4</i>    | <i>chromosome 8 open reading frame 4</i>                                              | 168.84   | 82.94  | 69.87  |
| 154043                            | <i>CNKSR3</i>    | <i>CNKSR family member 3</i>                                                          | 460.36   | 144.04 | 113.63 |
| 25827                             | <i>FBXL2=SCF</i> | <i>F-box and leucine-rich repeat protein 2</i>                                        | 387.80   | 142.04 | 196.52 |
| 10586                             | <i>MAB21L2</i>   | <i>mab-21-like 2 (C. elegans)</i>                                                     | 1,108.96 | 87.40  | 58.62  |
| 117583                            | <i>PARD3B</i>    | <i>par-3 partitioning defective 3 homolog B (C. elegans)</i>                          | 478.38   | 221.64 | 172.10 |
| 221692                            | <i>PHACTR1</i>   | <i>phosphatase and actin regulator 1</i>                                              | 293.74   | 133.44 | 179.63 |
| 5738                              | <i>PTGFRN</i>    | <i>prostaglandin F2 receptor negative regulator</i>                                   | 1,011.31 | 460.16 | 482.20 |
| 5920                              | <i>RARRES3</i>   | <i>retinoic acid receptor responder (tazarotene induced) 3</i>                        | 822.85   | 183.22 | 122.87 |
| 387496                            | <i>RASL11A</i>   | <i>RAS-like, family 11, member A</i>                                                  | 562.03   | 109.31 | 110.51 |
| 9770                              | <i>RASSF2</i>    | <i>Ras association (RalGDS/AF-6) domain family member 2</i>                           | 2,222.80 | 511.12 | 353.93 |
| 83937                             | <i>RASSF4</i>    | <i>Ras association (RalGDS/AF-6) domain family member 4</i>                           | 844.54   | 133.25 | 179.19 |
| 6000                              | <i>RGS7</i>      | <i>regulator of G-protein signaling 7</i>                                             | 341.54   | 76.01  | 104.05 |
| 83853                             | <i>ROPNIL</i>    | <i>rhopilin associated tail protein 1-like</i>                                        | 763.00   | 225.85 | 123.32 |
| 8991                              | <i>SELENBP1</i>  | <i>selenium binding protein 1</i>                                                     | 2,774.32 | 878.88 | 659.08 |
| 53358                             | <i>SHC3</i>      | <i>SHC (Src homology 2 domain containing) transforming protein 3</i>                  | 797.94   | 209.13 | 250.88 |
| 7035                              | <i>TFPI</i>      | <i>tissue factor pathway inhibitor (lipoprotein-associated coagulation inhibitor)</i> | 411.99   | 123.24 | 69.91  |
| <b>Transcriptional regulation</b> |                  |                                                                                       |          |        |        |
| 1749                              | <i>DLX5</i>      | <i>distal-less homeobox 5</i>                                                         | 418.74   | 106.42 | 81.89  |
| 2114                              | <i>ETS2</i>      | <i>v-ets erythroblastosis virus E26 oncogene homolog 2 (avian)</i>                    | 740.82   | 348.60 | 621.02 |
| 2294                              | <i>FOXF1</i>     | <i>forkhead box F1</i>                                                                | 768.86   | 182.83 | 101.53 |
| 9079                              | <i>LDB2</i>      | <i>LIM domain binding 2</i>                                                           | 1,260.05 | 428.25 | 800.85 |
| 431707                            | <i>LHX8</i>      | <i>LIM homeobox 8</i>                                                                 | 735.18   | 68.93  | 57.84  |
| 4286                              | <i>MITF</i>      | <i>microphthalmia-associated transcription factor</i>                                 | 227.47   | 111.40 | 103.55 |
| 5083                              | <i>PAX9</i>      | <i>paired box 9</i>                                                                   | 4,117.50 | 102.03 | 75.43  |
| 5307                              | <i>PITX1</i>     | <i>paired-like homeodomain 1</i>                                                      | 1,039.93 | 281.68 | 163.81 |
| 5468                              | <i>PPARG</i>     | <i>peroxisome proliferator-activated receptor gamma</i>                               | 524.44   | 100.81 | 62.96  |
| 56849                             | <i>TCEAL7</i>    | <i>transcription elongation factor A (SII)-like 7</i>                                 | 353.00   | 175.74 | 221.59 |
| <b>Others</b>                     |                  |                                                                                       |          |        |        |
| 147463                            | <i>ANKRD29</i>   | <i>ankyrin repeat domain 29</i>                                                       | 410.47   | 139.90 | 97.52  |
| 83938                             | <i>C10orf11</i>  | <i>chromosome 10 open reading frame 11</i>                                            | 323.62   | 108.12 | 60.18  |
| 152078                            | <i>C3orf55</i>   | <i>chromosome 3 open reading frame 55</i>                                             | 379.27   | 166.05 | 130.17 |

|        |                |                                                                 |          |        |        |
|--------|----------------|-----------------------------------------------------------------|----------|--------|--------|
| 83641  | <i>FAM107B</i> | <i>family with sequence similarity 107, member B</i>            | 437.79   | 211.14 | 347.81 |
| 221303 | <i>FAM162B</i> | <i>family with sequence similarity 162, member B</i>            | 1,349.86 | 576.11 | 818.38 |
| 54855  | <i>FAM46C</i>  | <i>family with sequence similarity 46, member C</i>             | 326.17   | 95.40  | 89.89  |
| 144363 | <i>LYRM5</i>   | <i>LYR motif containing 5</i>                                   | 1,026.89 | 437.41 | 289.32 |
| 57523  | <i>NYNRIN</i>  | <i>NYN domain and retroviral integrase containing</i>           | 1,838.88 | 532.23 | 388.31 |
| 22874  | <i>PLEKHA6</i> | <i>pleckstrin homology domain containing, family A member 6</i> | 723.64   | 253.54 | 247.55 |
| 54970  | <i>TTC12</i>   | <i>tetratricopeptide repeat domain 12</i>                       | 241.10   | 95.59  | 175.52 |
| 125488 | <i>TTC39C</i>  | <i>tetratricopeptide repeat domain 39C</i>                      | 1,445.40 | 530.95 | 908.84 |
| 51186  | <i>WBP5</i>    | <i>WW domain binding protein 5</i>                              | 550.84   | 181.33 | 200.36 |

---

**\*The numbers indicate average signal values in each cell type.**

Supplementary Table S6. Gene list in G3 categorized in Figure 4A.

[hDFs > hOFs = hOF-iPSCs (70 genes)]

| Entrez GeneID           | Symbol    | Gene name                                                                               | hOFs*   | hDFs*   | hOF-iPSCs* |
|-------------------------|-----------|-----------------------------------------------------------------------------------------|---------|---------|------------|
| <b>ECM/Secreted</b>     |           |                                                                                         |         |         |            |
| 51129                   | ANGPTL4   | angiopoietin-like 4                                                                     | 157.23  | 322.41  | 114.71     |
| 392255                  | GDF6      | growth differentiation factor 6                                                         | 110.65  | 320.69  | 82.52      |
| 83729                   | INHBE     | inhibin, beta E                                                                         | 101.29  | 361.81  | 131.59     |
| 3885                    | KRT34     | keratin 34                                                                              | 96.51   | 396.44  | 49.84      |
| 56034                   | PDGFC     | platelet derived growth factor C                                                        | 175.70  | 502.13  | 123.82     |
| 11341                   | SCRG1     | stimulator of chondrogenesis 1                                                          | 66.24   | 143.64  | 45.59      |
| 7292                    | TNFSF4    | tumor necrosis factor (ligand) superfamily, member 4                                    | 73.65   | 407.97  | 73.64      |
| <b>Membrane protein</b> |           |                                                                                         |         |         |            |
| 3084                    | NRG1      | neuregulin 1                                                                            | 194.47  | 401.57  | 123.72     |
| 8828                    | NRP2      | neuropilin 2                                                                            | 163.95  | 502.96  | 290.66     |
| 4908                    | NTF3      | neurotrophin 3                                                                          | 93.99   | 292.12  | 61.57      |
| 4978                    | OPCML     | opioid binding protein/cell adhesion molecule-like                                      | 66.32   | 239.11  | 126.11     |
| 8482                    | SEMA7A    | semaphorin 7A, GPI membrane anchor (John Milton Hagen blood group)                      | 368.52  | 1096.90 | 339.94     |
| 80329                   | ULBP1     | UL16 binding protein 1                                                                  | 226.29  | 838.48  | 161.63     |
| <b>Receptor</b>         |           |                                                                                         |         |         |            |
| 150                     | ADRA2A    | adrenoceptor alpha 2A                                                                   | 358.04  | 807.06  | 253.66     |
| 9568                    | GABBR2    | gamma-aminobutyric acid (GABA) B receptor, 2                                            | 190.81  | 439.48  | 170.06     |
| 2861                    | GPR37     | G protein-coupled receptor 37 (endothelin receptor type B-like)                         | 81.05   | 186.10  | 145.51     |
| 2898                    | GRIK2     | glutamate receptor, ionotropic, kainate 2                                               | 56.26   | 126.45  | 60.08      |
| 5798                    | PTPRN     | protein tyrosine phosphatase, receptor type, N                                          | 167.46  | 864.93  | 171.57     |
| 51330                   | TNFRSF12A | tumor necrosis factor receptor superfamily, member 12A                                  | 1814.14 | 4302.70 | 1907.53    |
| 219699                  | UNC5B     | unc-5 homolog B (C. elegans)                                                            | 668.99  | 2425.98 | 574.30     |
| <b>Enzyme</b>           |           |                                                                                         |         |         |            |
| 978                     | CDA       | cytidine deaminase                                                                      | 134.37  | 474.77  | 238.77     |
| 9023                    | CH25H     | cholesterol 25-hydroxylase                                                              | 130.93  | 1883.66 | 160.70     |
| 11072                   | DUSP14    | dual specificity phosphatase 14                                                         | 437.06  | 1031.69 | 322.69     |
| 2026                    | ENO2      | enolase 2 (gamma, neuronal)                                                             | 351.59  | 948.42  | 640.23     |
| 3037                    | HAS2      | hyaluronan synthase 2                                                                   | 306.76  | 1542.76 | 217.43     |
| 60676                   | PAPPA2    | pappalysin 2                                                                            | 77.98   | 227.62  | 68.48      |
| 5587                    | PRKD1     | protein kinase D1                                                                       | 281.49  | 821.26  | 210.26     |
| 8710                    | SERPINB7  | serpin peptidase inhibitor, clade B (ovalbumin), member 7                               | 40.55   | 161.10  | 29.01      |
| <b>Signaling</b>        |           |                                                                                         |         |         |            |
| 9472                    | AKAP6     | A kinase (PRKA) anchor protein 6                                                        | 96.41   | 228.78  | 64.73      |
| 10123                   | ARL4C     | ADP-ribosylation factor-like 4C                                                         | 150.13  | 331.18  | 220.70     |
| 595                     | CCND1     | cyclin D1                                                                               | 854.39  | 1845.44 | 1093.25    |
| 117248                  | GALNTL2   | UDP-N-acetyl-alpha-D-galactosamine:polypeptide N-acetylgalactosaminyltransferase-like 2 | 78.33   | 304.28  | 54.37      |

|       |                 |                                                            |        |         |        |
|-------|-----------------|------------------------------------------------------------|--------|---------|--------|
| 80000 | <i>GREB1L</i>   | <i>growth regulation by estrogen in breast cancer-like</i> | 68.39  | 149.22  | 49.06  |
| 81851 | <i>KRTAP1-1</i> | <i>keratin associated protein 1-1</i>                      | 407.75 | 1030.52 | 212.39 |
| 81872 | <i>KRTAP2-1</i> | <i>keratin associated protein 2-1</i>                      | 963.09 | 2000.59 | 488.66 |
| 29995 | <i>LMCD1</i>    | <i>LIM and cysteine-rich domains 1</i>                     | 470.47 | 1885.54 | 467.76 |
| 4642  | <i>MYO1D</i>    | <i>myosin ID</i>                                           | 787.51 | 1867.04 | 610.42 |
| 57451 | <i>ODZ2</i>     | <i>odz, odd Oz/ten-m homolog 2 (Drosophila)</i>            | 120.85 | 2989.18 | 82.22  |
| 57381 | <i>RHOJ</i>     | <i>ras homolog family member J</i>                         | 110.27 | 733.84  | 85.10  |

### Transcriptional regulation

|        |                |                                  |        |         |        |
|--------|----------------|----------------------------------|--------|---------|--------|
| 646    | <i>BNC1</i>    | <i>basonuclin 1</i>              | 110.92 | 302.91  | 115.19 |
| 2119   | <i>ETV5</i>    | <i>ets variant 5</i>             | 278.62 | 753.87  | 316.87 |
| 3201   | <i>HOXA4</i>   | <i>homeobox A4</i>               | 56.22  | 197.06  | 47.74  |
| 3203   | <i>HOXA6</i>   | <i>homeobox A6</i>               | 124.56 | 251.45  | 94.94  |
| 3204   | <i>HOXA7</i>   | <i>homeobox A7</i>               | 97.80  | 443.06  | 94.46  |
| 3205   | <i>HOXA9</i>   | <i>homeobox A9</i>               | 109.45 | 453.34  | 76.16  |
| 3212   | <i>HOXB2</i>   | <i>homeobox B2</i>               | 104.86 | 949.20  | 92.03  |
| 3213   | <i>HOXB3</i>   | <i>homeobox B3</i>               | 95.23  | 504.78  | 72.78  |
| 3215   | <i>HOXB5</i>   | <i>homeobox B5</i>               | 61.76  | 186.66  | 49.10  |
| 3216   | <i>HOXB6</i>   | <i>homeobox B6</i>               | 66.54  | 375.16  | 50.91  |
| 3217   | <i>HOXB7</i>   | <i>homeobox B7</i>               | 56.39  | 125.71  | 42.66  |
| 3218   | <i>HOXB8</i>   | <i>homeobox B8</i>               | 109.84 | 301.85  | 90.79  |
| 3219   | <i>HOXB9</i>   | <i>homeobox B9</i>               | 115.73 | 759.22  | 87.43  |
| 3226   | <i>HOXC10</i>  | <i>homeobox C10</i>              | 80.33  | 1175.04 | 59.24  |
| 3222   | <i>HOXC5</i>   | <i>homeobox C5</i>               | 46.06  | 231.32  | 41.30  |
| 3223   | <i>HOXC6</i>   | <i>homeobox C6</i>               | 72.55  | 771.85  | 59.02  |
| 3224   | <i>HOXC8</i>   | <i>homeobox C8</i>               | 119.99 | 1081.51 | 77.57  |
| 3225   | <i>HOXC9</i>   | <i>homeobox C9</i>               | 62.23  | 432.30  | 51.29  |
| 3234   | <i>HOXD8</i>   | <i>homeobox D8</i>               | 138.92 | 341.93  | 75.36  |
| 3235   | <i>HOXD9</i>   | <i>homeobox D9</i>               | 172.26 | 377.58  | 123.78 |
| 56956  | <i>LHX9</i>    | <i>LIM homeobox 9</i>            | 95.70  | 601.44  | 67.02  |
| 137814 | <i>NKX2-6</i>  | <i>NK2 homeobox 6</i>            | 137.03 | 388.34  | 103.74 |
| 9792   | <i>SERTAD2</i> | <i>SERTA domain containing 2</i> | 320.00 | 822.43  | 186.38 |
| 6910   | <i>TBX5</i>    | <i>T-box 5</i>                   | 118.86 | 770.39  | 76.33  |

### miRNA

|        |                 |                                              |        |        |       |
|--------|-----------------|----------------------------------------------|--------|--------|-------|
| 400765 | <i>MIR137HG</i> | <i>MIR137 host gene (non-protein coding)</i> | 121.41 | 256.82 | 76.12 |
| 406973 | <i>MIR196A2</i> | <i>microRNA 196a-2</i>                       | 53.73  | 126.24 | 47.60 |

### Others

|        |                 |                                                                  |        |        |        |
|--------|-----------------|------------------------------------------------------------------|--------|--------|--------|
| 25841  | <i>ABTB2</i>    | <i>ankyrin repeat and BTB (POZ) domain containing 2</i>          | 186.86 | 390.65 | 186.25 |
| 79870  | <i>BAALC</i>    | <i>brain and acute leukemia, cytoplasmic</i>                     | 112.21 | 237.19 | 88.72  |
| 285761 | <i>DCBLD1</i>   | <i>discoïdin, CUB and LCCL domain containing 1</i>               | 186.00 | 447.59 | 181.15 |
| 54757  | <i>FAM20A</i>   | <i>family with sequence similarity 20, member A</i>              | 140.73 | 475.58 | 163.94 |
| 196051 | <i>PPAPDC1A</i> | <i>phosphatidic acid phosphatase type 2 domain containing 1A</i> | 171.52 | 736.63 | 135.56 |

\*The numbers indicate average signal values in each cell type.

**Supplementary Table S7. Gene list in G4 categorized in Figure 4A.**

[hDFs = hOF-iPSCs > hOFs (22 genes)]

| Entrez GeneID           | Symbol          | Gene name                                                                            | hOFs*   | hDFs*   | hOF-iPSCs* |
|-------------------------|-----------------|--------------------------------------------------------------------------------------|---------|---------|------------|
| <b>Membrane protein</b> |                 |                                                                                      |         |         |            |
| 1948                    | <i>EFNB2</i>    | <i>ephrin-B2</i>                                                                     | 61.51   | 255.89  | 164.79     |
| 2861                    | <i>GPR37</i>    | <i>G protein-coupled receptor 37 (endothelin receptor type B-like)</i>               | 81.05   | 186.10  | 145.51     |
| 2890                    | <i>GRIA1</i>    | <i>glutamate receptor, ionotropic, AMPA 1</i>                                        | 86.27   | 375.72  | 194.07     |
| 58494                   | <i>JAM2</i>     | <i>junctional adhesion molecule 2</i>                                                | 284.11  | 1189.57 | 649.12     |
| 4978                    | <i>OPCML</i>    | <i>opioid binding protein/cell adhesion molecule-like</i>                            | 66.32   | 239.11  | 126.11     |
| 84898                   | <i>PLXDC2</i>   | <i>plexin domain containing 2</i>                                                    | 114.84  | 831.44  | 1644.58    |
| 79845                   | <i>RNF122</i>   | <i>ring finger protein 122</i>                                                       | 226.50  | 469.62  | 509.37     |
| 6507                    | <i>SLC1A3</i>   | <i>solute carrier family 1 (glial high affinity glutamate transporter), member 3</i> | 87.69   | 223.11  | 205.04     |
| <b>Receptor</b>         |                 |                                                                                      |         |         |            |
| 8828                    | <i>NRP2</i>     | <i>neuropilin 2</i>                                                                  | 163.95  | 502.96  | 290.66     |
| 114880                  | <i>OSBPL6</i>   | <i>oxysterol binding protein-like 6</i>                                              | 100.30  | 204.24  | 265.24     |
| <b>Enzyme</b>           |                 |                                                                                      |         |         |            |
| 205                     | <i>AK4</i>      | <i>adenylate kinase 4</i>                                                            | 130.69  | 816.18  | 1043.56    |
| 219                     | <i>ALDH1B1</i>  | <i>aldehyde dehydrogenase 1 family, member B1</i>                                    | 1367.53 | 2750.02 | 2787.63    |
| 481                     | <i>ATP1B1</i>   | <i>ATPase, Na<sup>+</sup>/K<sup>+</sup> transporting, beta 1 polypeptide</i>         | 154.65  | 326.04  | 580.63     |
| 978                     | <i>CDA</i>      | <i>cytidine deaminase</i>                                                            | 134.37  | 474.77  | 238.77     |
| 2026                    | <i>ENO2</i>     | <i>enolase 2 (gamma, neuronal)</i>                                                   | 351.59  | 948.42  | 640.23     |
| 25797                   | <i>QPCT</i>     | <i>glutaminyl-peptide cyclotransferase</i>                                           | 126.52  | 422.84  | 293.24     |
| <b>Signaling</b>        |                 |                                                                                      |         |         |            |
| 79822                   | <i>ARHGAP28</i> | <i>Rho GTPase activating protein 28</i>                                              | 77.13   | 212.41  | 259.33     |
| 10123                   | <i>ARL4C</i>    | <i>ADP-ribosylation factor-like 4C</i>                                               | 150.13  | 331.18  | 220.70     |
| 595                     | <i>CCND1</i>    | <i>cyclin D1</i>                                                                     | 854.39  | 1845.44 | 1093.25    |
| 1600                    | <i>DAB1</i>     | <i>disabled homolog 1 (Drosophila)</i>                                               | 90.64   | 424.81  | 291.18     |
| 55714                   | <i>ODZ3</i>     | <i>odz, odd Oz/ten-m homolog 3 (Drosophila)</i>                                      | 154.87  | 746.81  | 1330.60    |
| <b>Others</b>           |                 |                                                                                      |         |         |            |
| 90768                   | <i>MGC45800</i> | <i>uncharacterized LOC90768</i>                                                      | 137.47  | 344.63  | 381.19     |

\*The numbers indicate average signal values in each cell type.

**Supplementary Table S8. Gene list in Figure 4D.**

| <b>Entrez<br/>GeneID</b> | <b><i>Symbol</i></b> | <b><i>Gene name</i></b>                                |
|--------------------------|----------------------|--------------------------------------------------------|
| 2103                     | <i>ESRRB</i>         | <i>estrogen-related receptor beta</i>                  |
| 8928                     | <i>FOXH1</i>         | <i>forkhead box H1</i>                                 |
| 148979                   | <i>GLIS1</i>         | <i>GLIS family zinc finger 1</i>                       |
| 79727                    | <i>LIN28A</i>        | <i>lin-28 homolog A (C. elegans)</i>                   |
| 53615                    | <i>MBD3</i>          | <i>methyl-CpG binding domain protein 3</i>             |
| 55384                    | <i>MEG3</i>          | <i>maternally expressed 3 (non-protein coding)</i>     |
| 79923                    | <i>NANOG</i>         | <i>Nanog homeobox</i>                                  |
| 2494                     | <i>NR5A2</i>         | <i>nuclear receptor subfamily 5, group A, member 2</i> |
| 63978                    | <i>PRDM14</i>        | <i>PR domain containing 14</i>                         |
| 5916                     | <i>RARG</i>          | <i>retinoic acid receptor, gamma</i>                   |
| 57167                    | <i>SALL4</i>         | <i>spalt-like transcription factor 4</i>               |
| 6926                     | <i>TBX3</i>          | <i>T-box 3</i>                                         |
